# Supplementary material
Source: publisher figshare collection journal article supplement (https://gsapubs.figshare.com/ndownloader/files/25118024)
Supplement: Supplementary file 1 [file 25118024]

## Sheet: TR-Cpx, Opx
Supplementary Table DR2- Trace elements composition of clinopyroxene and orthopyroxene from lherzolites, impregnated lherzolite, plagioclase lherzolite and cumulate gabbros.
					Cumulate gabbro											Impregnated lherzolite												Lherzolite											Lherzolite										Plagioclase lherzolite
Sample No	TH11-51-01	TH11-51-02	TH11-51-03	TH11-51-04	TH11-51-05	TH11-51-06	TH11-51-07	TH11-51-08	TH11-51-09	TH11-51-10		TH11-45-01	TH11-45-02	TH11-45-03	TH11-45-04	TH11-45-05	TH11-45-06	TH11-45-07	TH11-45-08	TH11-45-09	TH11-45-10		TH11-46-01	TH11-46-02	TH11-46-03	TH11-46-04	TH11-46-05	TH11-46-06	TH11-46-07	TH11-46-08	TH11-46-09	TH11-46-10		TH11-63-01	TH11-63-02	TH11-63-03	TH11-63-04	TH11-63-05	TH11-63-06	TH11-63-07	TH11-63-08	TH11-63-09	TH11-63-10		TH11-59-01	TH11-59-02	TH11-59-03	TH11-59-04	TH11-59-05
Mineral	Cpx	Cpx	Cpx	Cpx	Cpx	Plag	Opx	Opx	Opx	Opx		Cpx	Cpx	Cpx	Cpx	Cpx	Cpx	Cpx	Cpx	Cpx	Cpx		Cpx	Cpx	Cpx	Cpx	Cpx	Cpx	Cpx	Cpx	Cpx	Cpx		Cpx	Cpx	Cpx	Cpx	Cpx	Cpx	Cpx	Cpx	Cpx	Cpx		Cpx	Cpx	Cpx	Cpx	Cpx
Li	<0.45	<0.45	0.52	0.54	0.6	<1.13	<0.61	<0.64	<0.52	0.6		3.04	4.07	3.98	2.69	2.55	3.89	3.66	3.88	3.81	5.42		4.86	4	5.37	3.77	5.48	4.62	4.28	3.71	3.79	3.89		5	3.54	2.86	3.7	4.76	3.72	3.6	4.46	3.2	7.74		2.12	2.12	1.45	2.27	1.78
Be	<0.135	<0.139	0.187	<0.113	<0.165	<0.37	<0.240	<0.195	<0.150	<0.131		<0.186	<0.226	<0.181	<0.211	<0.183	<0.213	<0.121	0.14	0.197	<0.166		<0.154	<0.194	0.122	<0.254	<0.203	<0.215	<0.224	<0.163	<0.216	<0.260		<0.154	0.093	<0.127	<0.190	<0.209	<0.133	<0.166	<0.121	<0.199	<0.275		<0.207	<0.190	<0.193	<0.147	<0.187
B	16.81	15.44	15.58	13.71	12.98	17.95	17.06	18.36	14.9	12.85		14.97	18.61	14.89	18.64	14.98	17.36	12.12	13.95	16	16.18		15.09	15.34	33.72	14.34	18.9	13.05	25.52	13.44	15.25	11.39		10.01	14.69	12.25	10.87	13.51	12.19	11.43	13.04	13.97	23.11		21.94	23.41	23.37	16.27	15.01
Na	1405.1	1329.86	1496.31	1383.69	1390.64	8416.04	49.12	47.51	59.25	56.32		7646.83	8163.64	7874.83	7047.2	7229.66	7901.33	7746.63	7883.99	8050.79	7884.94		9597.27	9438.77	9569.38	9485.36	9842.9	9312.23	9257.48	9172.16	9093.13	9269.98		11914.1	9489.38	9402.18	10594.4	9193.8	7673.25	9513.61	7935.69	10037.2	8422.95		939.7	972.23	881.91	913.03	948
Mg	107768	108088	112440	112706	110506	163.3	232631	244280	201324	197266		110463	169288	111823	120390	115156	122099	114545	118201	127923	123753		114966	118661	137442	108930	123294	110010	118267	110712	110235	117713		117668	108875	106984	110707	105155	98973.8	103773	100738	114387	120577		119411	123301	129539	132069	121991
Al	12903.6	11545	13429.8	11294.1	11355.2	215283	10364.9	11056.2	8649.58	8478.98		36427.8	48391.9	36555.6	29322.7	29626.6	35336.2	33148.7	34806.1	36440.1	35213.8		37478.5	36084.5	38025.1	36293	39052	34621.1	34219.4	34952.1	36100.7	37180.4		36174	29777.5	32276.4	37367.6	33589.9	27293.6	36887.2	31684.5	35865	34060		15774.5	18048.7	16781.9	17517.2	15632.8
Si	255495	253922	264552	262390	258029	269909	335579	358368	297231	289603		258231	336181	262268	266771	263523	274395	264638	269083	283564	276486		263822	265720	282023	258965	273151	263624	262669	261384	259840	268266		269041	260846	255971	263683	251232	234480	244286	238542	258249	263221		264513	267123	264044	277100	265873
P	32.44	31.22	30.29	30.35	33.17	46.94	48.71	60.85	40.67	29.82		36.02	46.38	37.57	32.53	31.5	34.23	32.77	35.69	53.19	30.05		33.81	43.58	34.49	45.36	32.79	29.32	33.16	26.41	31.84	29.66		33.58	34.5	39.03	36.22	36.43	32.74	43.39	34.32	40.13	31.86		28.66	31.99	37.53	28.45	31.69
K	4.65	<2.05	31.64	<2.03	<2.02	175	<2.75	<2.89	<2.36	<2.34		<2.32	10	4.64	<2.24	<2.25	<2.39	6.79	5.49	14.03	5.56		<2.66	3.49	6.8	27.2	<2.75	<2.58	3	<2.58	<2.58	<2.66		3.85	16.86	<2.31	5.16	5.99	3.54	32.68	8.06	9	17.24		3.32	50.3	<3.09	<2.54	<2.38
Ca	318256	320624	322239	320293	322250	286487	15798.7	15806.5	15786	15751.2		323648	322859	319757	321280	321091	322320	321410	320105	325517	323020		315068	314271	314634	314184	314634	318464	314168	315792	315354	314704		309896	309893	309761	308493	309961	310990	310103	312450	311204	313275		336337	336337	337748	337640	335608
Sc	107.3	109.96	108.19	104.35	105.89	0.65	54.56	58.8	47.83	46.57		55.06	58.54	52.18	63.76	64.87	56.68	60.44	57.32	58.5	59.6		52.38	54.41	55.63	51.54	53.39	57.89	57.78	57.38	57.22	57.17		64.06	62.67	59.31	56.83	55.45	61.58	56.87	64.16	59.24	62.15		85.46	83.2	97.83	85.77	83.34
Ti	1002.91	1013.02	1022.33	969.06	992.95	24.18	608.22	636.35	529.2	510.67		2030.45	2148.04	1976.02	2166.71	2276.47	2223.62	2212.21	2075.14	2089.38	2129.41		1996.68	1968.76	1971.57	1881.94	1995.41	2099.24	2025.42	1993.53	2151.86	2033.77		3084.01	2251.48	2620.44	2599.4	2539.72	2039.84	2524.3	2566.1	2886.64	3257.22		634.75	601.1	675.87	555.34	555.34
V	325.14	335.59	335.04	330.81	324.95	0.872	175.47	194.91	165.96	163.71		285.32	332.84	283.24	302.83	311.03	307.24	300.23	303.67	307.96	313.99		265.65	272.31	291.56	261.93	275.21	277.99	270.51	273.28	275.54	278.92		329.83	295.6	297.88	294.63	281.74	250.92	265.08	272.72	288.53	289.09		246.73	252.56	252.37	246.63	238.35
Cr	407.96	397.09	388.87	395.36	391.46	<1.68	255.78	288.45	268.93	259.7		6808.33	8659.3	6800.43	5462.83	5812.63	6858.78	6042.87	6221.27	6678.54	6316.97		8153.12	7814.68	8342.04	7972.65	8296.89	7314.53	6972.12	7090.85	7202.46	7339.01		5532.62	4264.72	5038.13	5575.15	5053.21	4251.21	5328.51	4743.59	5265.5	5138.45		4895.29	4104.05	5012.75	5107.78	4890.26
Mn	1412.88	1361.98	1467.26	1473.18	1397.63	24.87	3014.68	3205.68	2681.28	2613.86		807.39	1153.53	790.92	716.55	713.44	836.09	802.96	848.73	890.43	854.81		828.36	803.59	893.55	747.76	796.37	743.56	747.93	728.42	736.07	781.41		860.46	859.52	771.61	931.98	840.81	774.06	781.7	1079.65	820.79	1191.22		1108.31	1298.3	1158.34	1326.14	1118.34
Fe	45117.4	43696.1	47275.1	47920.5	44892.3	2871.96	127464	135475	113301	110256		21734.8	34846	21286.1	20469	20441.3	24930.2	21681.8	22704.2	24332	23317.3		22717.7	22544.7	26029.5	19979.6	23462.2	19998	20673.2	19683.8	20565.7	21916.4		22410.9	20118.7	25964.1	23686	20796.8	21562.4	20471.1	27213.4	21588.6	27940.2		32011.9	33076.8	34210.1	37123.2	32397.3
Co	47.01	45.81	50.47	48.69	47.2	0.169	139.07	147.79	121.32	118.14		23.29	42.55	24	22.49	21.9	24.12	23.42	26.36	28.01	26.77		22.95	23.11	25.24	21.99	24.77	21.56	23.08	21.98	22.27	25.62		52.4	22.21	22.56	24.22	18.68	19.37	22.54	21.6	22.74	22.9		31.94	34.17	29.76	36.14	33.27
Ni	285.05	281.67	296.77	288.68	288.36		626.95	640.58	542.73	521.48		768.05	1215.35	765.18	688.54	702.8	753.47	751.53	797.25	858.87	844.63		750.97	737.53	837.8	715.95	769.43	725.03	727.81	696.8	694.73	789.62		788.15	626.37	783.98	692.29	626.56	581.32	673.28	623.15	678.02	660.8		484	523.59	481.52	550.18	515.51
Rb	<0.061	<0.061	<0.066	<0.054	<0.063	0.389	<0.066	<0.079	<0.066	<0.057		<0.070	0.168	<0.075	0.078	<0.068	<0.076	<0.064	<0.061	0.14	<0.072		<0.078	<0.080	<0.091	0.226	<0.089	<0.085	<0.083	<0.074	<0.069	0.078		<0.073	0.075	<0.061	0.136	<0.070	0.058	0.148	<0.063	0.144	0.133		<0.069	<0.075	<0.089	<0.066	<0.061
Sr	7.92	7.62	13.42	7.92	12.58	255.23	0.0311	0.0418	0.011	<0.0134		2.127	2.421	2.349	2.166	2.308	2.577	2.149	2.532	2.59	2.667		5.39	5.33	6.18	5.45	5.42	4.86	5.37	4.92	4.61	4.74		12.75	10.87	10.44	11.33	10.3	9.35	10.75	9.02	10.83	9.02		7.36	9.53	7.15	7.61	7.56
Y	6.82	6.34	7.1	6.66	6.75	0.064	1.007	1.175	0.942	0.885		15.27	15.29	15.6	14.95	14.3	15.44	15.21	14.62	14.41	15.12		15.52	15.01	14.7	15.11	15.23	15.28	14.46	15.2	15.88	14.46		14.71	13.4	15.18	15.46	15.52	15.51	16.32	16.16	16.05	16.84		3.19	2.99	3.18	3.04	3.04
Zr	1.529	1.508	1.556	1.432	1.471	<0.067	0.222	0.194	0.172	0.116		4	4.46	4.32	4.19	4.57	4.55	4.48	9.49	4.76	4.36		6.73	7.15	6.98	6.47	7.02	6.75	7.24	7.2	7.54	6.73		8.54	8.46	9.76	9.37	9.38	10.47	10.63	11.48	11.36	13.13		0.436	0.458	0.54	0.374	0.511
Nb	<0.0104	0.0025	<0.0114	<0.0084	<0.0084	<0.045	<0.0081	<0.0171	<0.0120	<0.0153		<0.0084	<0.0179	<0.0144	<0.0124	<0.0164	<0.0112	<0.0180	<0.0118	<0.0126	<0.0072		<0.0159	<0.0150	<0.0087	0.0058	<0.0220	<0.0123	<0.0096	<0.0190	0.0081	<0.0227		0.0102	<0.0109	<0.0164	<0.0074	<0.0086	<0.0103	<0.00	<0.0137	<0.0077	<0.0111		0.0085	<0.0174	<0.0182	0.0164	0.017
Cs	<0.033	<0.030	<0.037	<0.028	<0.031	0.124	<0.039	0.039	<0.043	<0.037		<0.037	<0.048	0.046	<0.032	<0.027	0.04	0.033	0.095	0.053	<0.029		<0.044	<0.043	0.173	0.116	<0.038	<0.046	0.049	0.077	<0.035	<0.039		<0.037	0.048	<0.032	0.048	<0.038	<0.026	0.065	<0.034	<0.044	<0.034		<0.041	<0.041	<0.039	<0.034	<0.038
Ba	0.0326	0.0436	0.138	<0.0117	0.0467	3.59	0.0151	<0.0254	<0.0220	<0.0171		<0.0215	0.029	<0.0212	0.0195	0.0202	0.0554	0.0207	0.0315	0.0223	0.0309		0.191	0.108	0.213	0.059	0.094	<0.0172	0.0579	<0.0227	0.0267	<0.0235		0.066	0.115	0.065	0.117	0.082	0.18	0.078	0.196	0.157	0.162		<0.0198	0.123	<0.019	<0.0240	0.0153
La	0.0723	0.0756	0.0849	0.0897	0.0841	0.115	<0.0135	<0.0257	<0.0129	<0.0128		<0.0080	<0.0105	<0.0120	0.0172	<0.0079	0.0088	<0.0080	<0.0138	<0.0148	<0.0158		0.013	0.007	0.0254	<0.0181	<0.0137	0.0097	0.0144	<0.0181	<0.0158	0.0131		0.032	0.0421	0.0281	0.0213	0.0515	0.0311	0.0361	<0.0182	0.0308	0.0451		0.0256	0.0285	<0.0185	<0.0157	0.0203
Ce	0.39	0.407	0.462	0.415	0.378	0.185	<0.0222	<0.0200	<0.0162	<0.0160		0.21	0.144	0.159	0.158	0.144	0.163	0.139	0.175	0.169	0.139		0.402	0.4	0.319	0.427	0.365	0.368	0.358	0.322	0.363	0.354		0.734	0.705	0.77	0.732	0.798	0.591	0.672	0.612	0.74	0.725		0.143	0.13	0.132	0.159	0.131
Pr	0.1051	0.0967	0.1026	0.1153	0.0913	<0.0179	<0.0171	<0.0199	<0.0129	<0.0107		0.1128	0.123	0.122	0.1038	0.0855	0.11	0.0981	0.0856	0.116	0.086		0.202	0.153	0.177	0.171	0.154	0.155	0.155	0.11	0.163	0.168		0.234	0.244	0.269	0.272	0.284	0.24	0.284	0.234	0.27	0.26		0.0346	0.0469	0.033	0.0317	0.0724
Nd	0.813	0.914	0.865	0.941	0.701	<0.191	<0.115	<0.116	<0.063	<0.088		1.159	1.048	1.064	1.064	1.288	1.302	1.259	1.105	1.326	1.167		1.63	1.69	1.6	1.75	1.454	1.363	1.514	1.367	1.62	1.82		2.2	2.03	1.91	2.31	2.35	1.756	2.4	1.98	2.32	2.52		0.22	0.279	0.221	0.26	0.282
Sm	0.587	0.454	0.586	0.42	0.486	<0.219	<0.080	<0.112	<0.090	<0.101		1.036	1.155	1.153	0.806	0.707	0.979	0.79	0.762	0.904	0.801		0.862	0.713	0.914	1.029	0.888	1.029	1.109	0.977	0.994	1.111		0.966	1.012	1.16	1.332	1.276	1.048	1.283	1.116	1.43	1.25		0.156	0.207	0.181	0.141	0.24
Eu	0.17	0.197	0.212	0.207	0.195	0.075	<0.0256	<0.0220	<0.0267	<0.0176		0.486	0.431	0.404	0.41	0.447	0.431	0.504	0.459	0.386	0.428		0.52	0.447	0.452	0.552	0.455	0.493	0.424	0.444	0.504	0.421		0.526	0.443	0.51	0.537	0.617	0.492	0.551	0.521	0.583	0.482		0.133	0.09	0.13	0.0594	0.083
Gd	0.85	0.886	1.07	0.816	0.713	<0.136	0.112	<0.118	<0.090	<0.089		2	1.54	2.03	1.67	1.75	1.69	1.73	1.6	1.89	1.72		2.11	2.04	2.02	1.57	1.74	1.78	1.66	2.11	1.94	1.71		1.63	1.74	1.88	2.27	2.21	2.14	2.17	1.96	2.19	2.42		0.322	0.475	0.45	0.467	0.387
Tb	0.164	0.184	0.156	0.177	0.164	0.028	<0.0157	<0.0143	<0.0134	<0.0140		0.369	0.387	0.365	0.365	0.337	0.405	0.361	0.334	0.35	0.339		0.36	0.321	0.386	0.354	0.352	0.332	0.338	0.337	0.38	0.384		0.351	0.318	0.394	0.41	0.428	0.325	0.425	0.418	0.421	0.42		0.0649	0.0613	0.106	0.0748	0.0763
Dy	1.238	1.256	1.403	1.262	1.304	<0.120	0.066	0.178	0.159	0.098		2.89	2.64	2.65	2.59	2.68	2.76	2.89	2.61	2.77	2.57		2.7	2.7	2.55	2.62	2.65	2.5	2.73	2.54	2.85	2.65		2.62	2.43	2.58	2.83	2.8	2.82	2.84	2.73	2.8	2.98		0.527	0.485	0.506	0.419	0.548
Ho	0.279	0.241	0.286	0.262	0.28	<0.033	0.0307	0.048	0.0286	0.0243		0.649	0.627	0.589	0.563	0.559	0.593	0.657	0.54	0.616	0.606		0.569	0.535	0.596	0.615	0.605	0.639	0.603	0.591	0.623	0.564		0.559	0.535	0.589	0.585	0.637	0.593	0.597	0.645	0.632	0.645		0.155	0.128	0.151	0.141	0.1124
Er	0.851	0.783	0.904	0.706	0.817	<0.095	0.115	0.138	0.088	0.15		1.725	1.673	1.691	1.866	1.765	1.9	1.93	1.835	1.614	2.045		1.77	1.811	1.789	1.746	1.795	1.933	1.732	1.748	1.838	1.718		1.604	1.638	1.754	1.632	1.856	1.665	1.81	1.875	1.808	2.02		0.393	0.406	0.26	0.383	0.331
Tm	0.116	0.112	0.1058	0.1073	0.1259	<0.028	0.0343	0.036	0.0231	0.0173		0.202	0.216	0.257	0.258	0.214	0.263	0.244	0.217	0.239	0.291		0.263	0.213	0.198	0.207	0.297	0.205	0.251	0.247	0.268	0.236		0.263	0.217	0.236	0.273	0.25	0.25	0.256	0.255	0.279	0.317		0.0584	0.0447	0.071	0.0395	0.047
Yb	0.691	0.735	0.892	0.73	0.722	<0.141	0.14	0.415	0.229	0.269		1.591	1.69	1.533	1.496	1.599	1.788	1.538	1.345	1.372	1.564		1.74	1.591	1.542	1.453	1.715	1.64	1.409	1.499	1.481	1.737		1.516	1.559	1.415	1.563	1.838	1.598	1.645	1.621	2	1.86		0.315	0.301	0.297	0.353	0.226
Lu	0.1207	0.0985	0.126	0.083	0.0935	<0.033	0.031	0.0591	0.0456	0.0333		0.231	0.251	0.221	0.235	0.224	0.208	0.256	0.197	0.211	0.213		0.237	0.214	0.212	0.209	0.201	0.231	0.219	0.237	0.21	0.208		0.203	0.224	0.243	0.272	0.255	0.225	0.234	0.227	0.25	0.258		0.0291	0.0657	0.0393	0.0363	0.0538
Hf	0.094	0.072	0.13	0.097	0.048	<0.095	<0.052	<0.072	<0.048	<0.037		0.362	0.501	0.274	0.43	0.357	0.411	0.365	0.599	0.43	0.42		0.44	0.304	0.442	0.346	0.423	0.429	0.476	0.417	0.456	0.477		0.509	0.491	0.598	0.46	0.559	0.672	0.623	0.693	0.559	0.615		0.0302	0.067	<0.044	<0.038	<0.052
Ta	<0.0084	<0.0107	<0.0054	<0.0064	<0.0082	<0.0183	<0.0142	<0.0118	0.0104	<0.0103		<0.0132	<0.0110	<0.0088	0.0094	<0.0096	0.01	<0.0146	<0.0071	<0.0136	<0.0087		<0.0107	<0.0140	<0.0118	<0.0081	<0.0128	0.0079	<0.0133	<0.0114	0.0088	<0.0108		<0.0082	<0.0105	<0.0093	<0.0132	<0.0098	<0.0124	<0.0090	<0.0086	<0.0086	<0.0088		<0.0117	<0.0119	<0.0117	<0.0085	<0.0092
Pb	0.0399	0.0202	<0.027	<0.0221	<0.033	0.26	<0.059	<0.0200	<0.032	<0.038		<0.037	<0.063	<0.046	<0.038	<0.038	0.033	<0.046	<0.033	<0.045	<0.035		<0.053	<0.045	<0.038	<0.038	<0.045	<0.042	<0.040	<0.044	<0.044	<0.045		<0.049	<0.044	<0.042	<0.044	0.039	<0.035	<0.036	0.043	<0.041	<0.031		<0.035	<0.043	<0.043	0.026	<0.046
Th	<0.0108	<0.0126	<0.0150	0.0061	0.0097	<0.030	<0.0154	<0.0236	<0.0123	<0.0137		<0.0164	<0.0206	<0.0172	<0.0176	<0.0141	<0.0149	<0.0119	<0.0185	<0.0173	<0.0189		<0.0117	<0.0246	<0.0171	<0.0124	<0.0218	<0.0176	0.015	<0.0197	<0.0169	<0.0139		<0.0191	<0.0148	<0.0136	<0.0179	<0.0170	<0.0116	<0.0138	<0.0089	<0.0132	<0.0190		<0.0213	<0.0196	<0.0144	<0.0146	<0.0105
U	<0.0101	<0.0177	<0.0102	0.0053	<0.0185	<0.035	<0.031	<0.0200	0.0126	0.0111		<0.0185	<0.0179	<0.0194	<0.0162	<0.0181	<0.0208	0.0145	0.0115	<0.0195	<0.0202		<0.0181	0.0193	<0.0185	<0.0164	<0.0176	<0.0225	<0.0217	<0.0176	0.0046	<0.0203		<0.0165	0.0148	<0.0136	<0.0117	<0.0111	<0.0142	<0.0191	<0.0097	0.0129	<0.0186		<0.0214	<0.0135	<0.030	0.0152	<0.0129
[truncated: 27 more columns]
